# Supplementary material for: Antifungal properties of lecithin- and terbinafine-loaded electrospun poly(ε-caprolactone) nanofibres
Source: Royal Society of Chemistry journal article supplement (doi:10.1039/c6ra04755f), 2016-01-01
Supplement: c6ra04755f1.pdf [file c6ra04755f1.pdf]

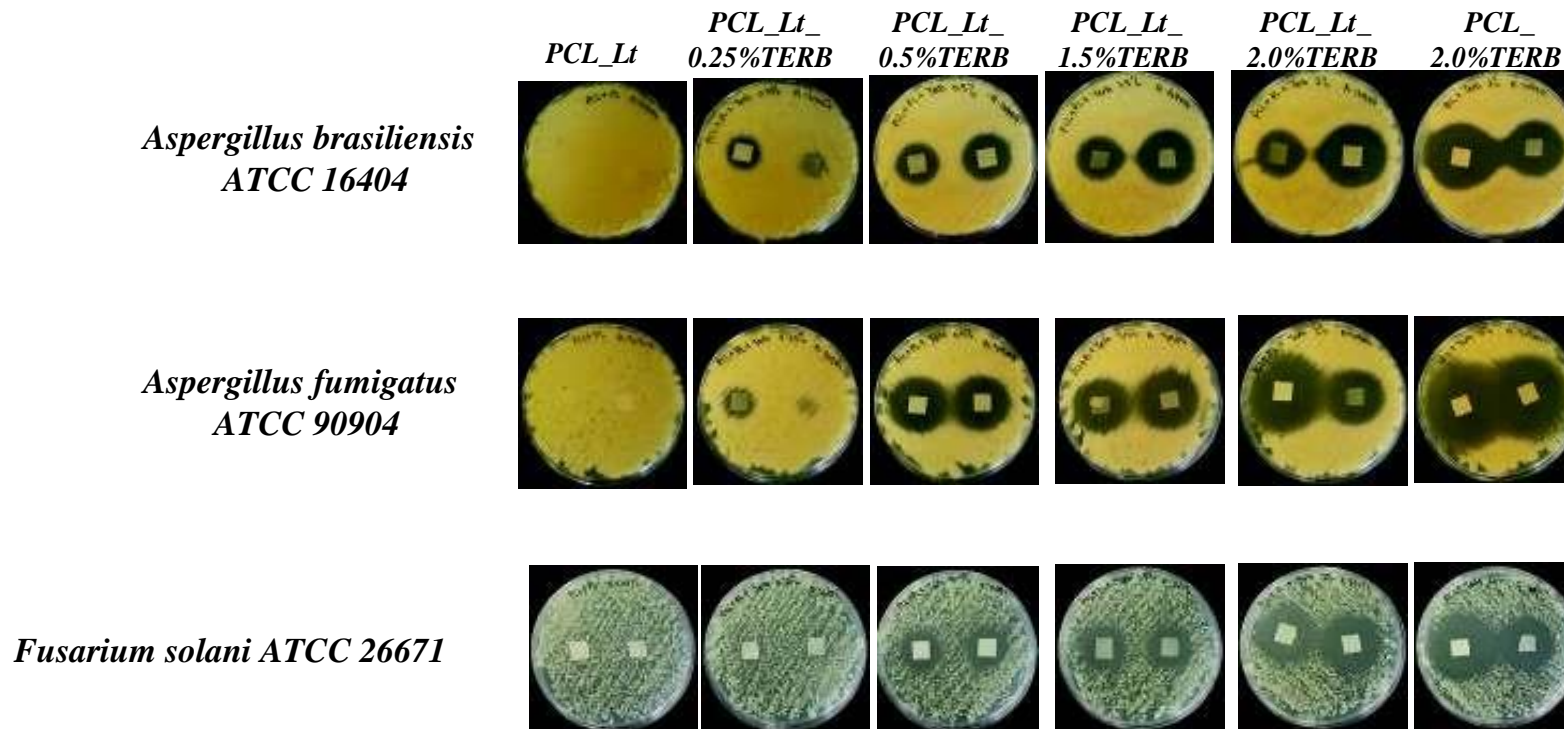

**Figure S1** Radial disc diffusion assay of emulsion electrospun PCL mats containing various concentration of terbinafine hydrochloride. The last column is PCL mats loaded with terbinafine without lecithin.

*Epidermophyton floccosum* ATCC 52063

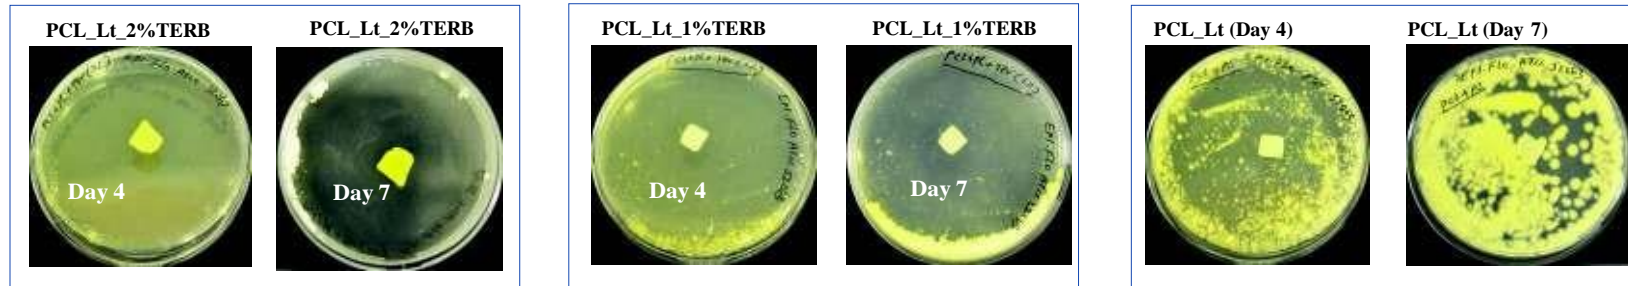

*Trichophyton mentagrophytes* ATCC MYA 4439

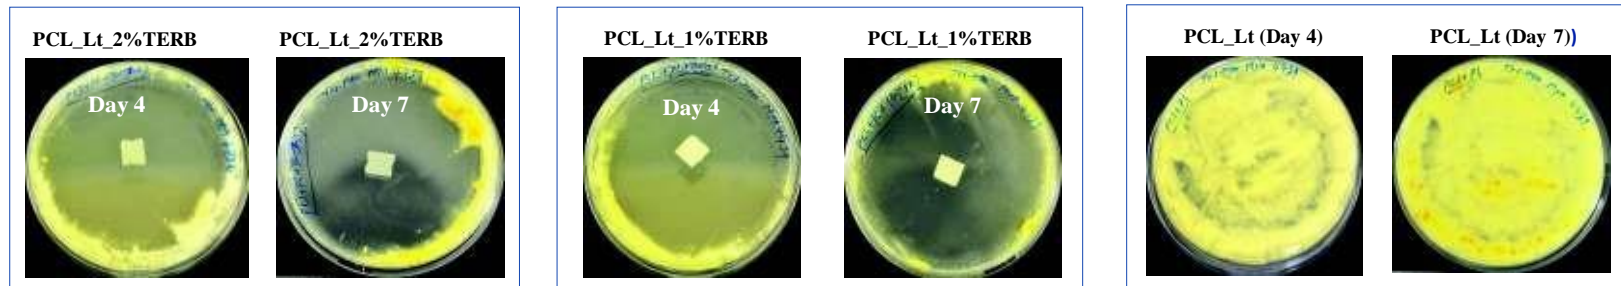

*Trichophyton rubrum* ATCC MYA-4438

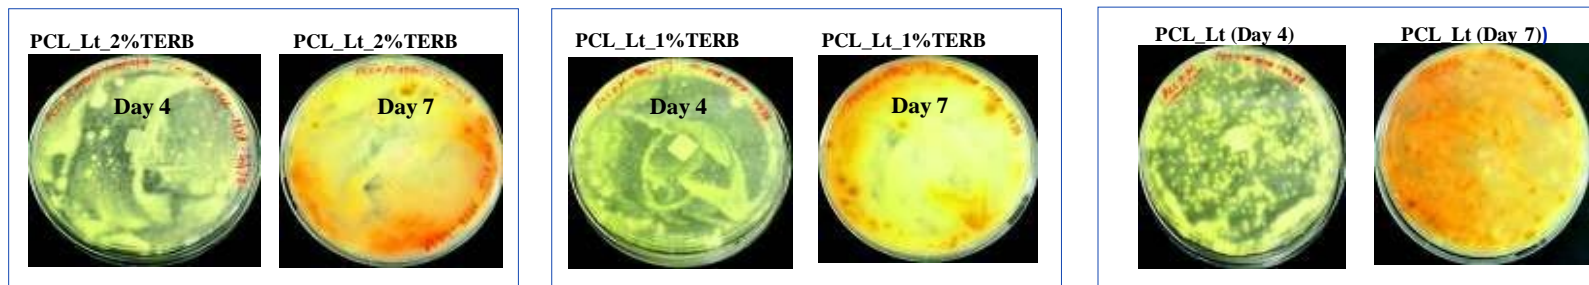

**Figure S2** Radial disc diffusion assay of emulsion electrospun PCL mats containing terbinafine hydrochloride against dermatophytic fungi. The disc diffusion was analyzed at two different time points.
